# Supplementary material for: Nuclear factor I-A regulates diverse reactive astrocyte responses after CNS injury
Source: JCI journal article supplement (doi:10.1172/jci127492), 2019-09-08
Supplement: sd1 [file 1]

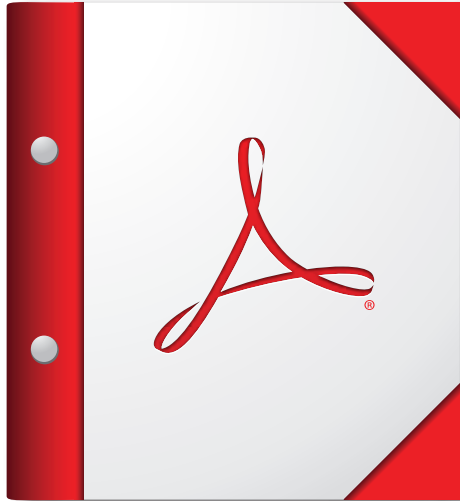

**For the best experience, open this PDF portfolio in  
Acrobat X or Adobe Reader X, or later.**

[Get Adobe Reader Now!](#)
